# Supplementary material
Source: PubMed Central journal article supplement (PMC5455067)

Mouse

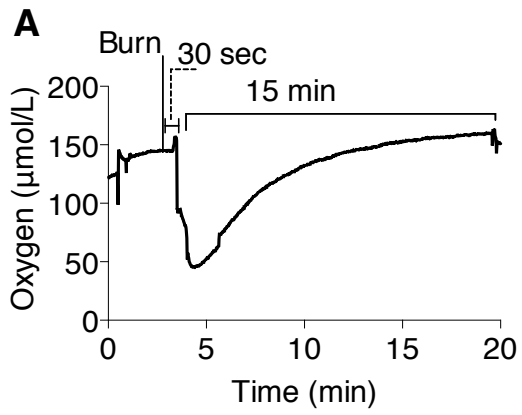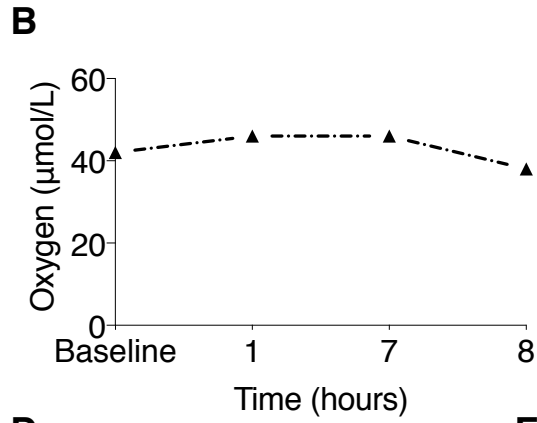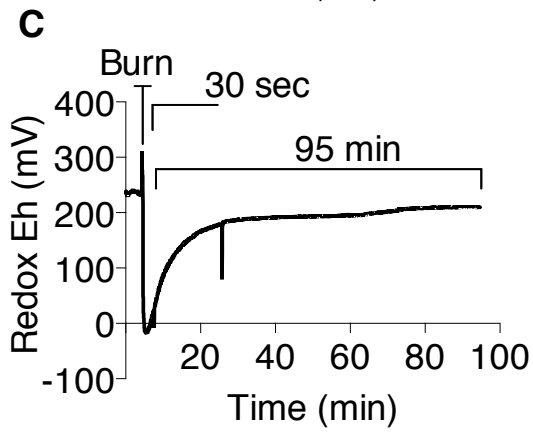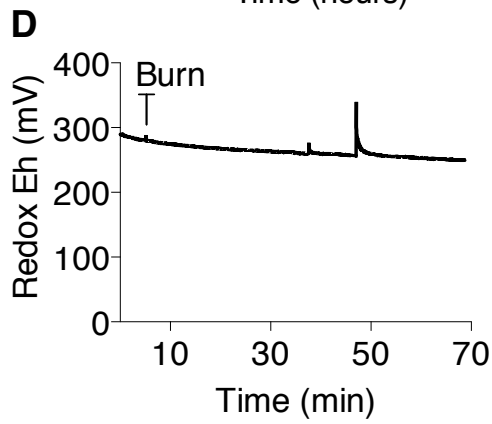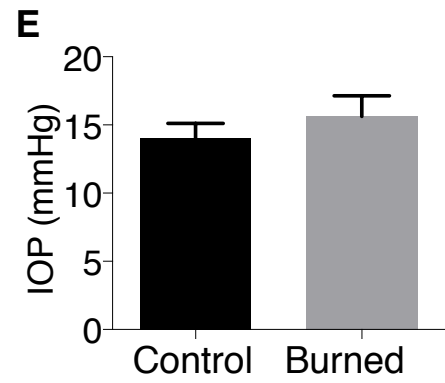

Rabbit

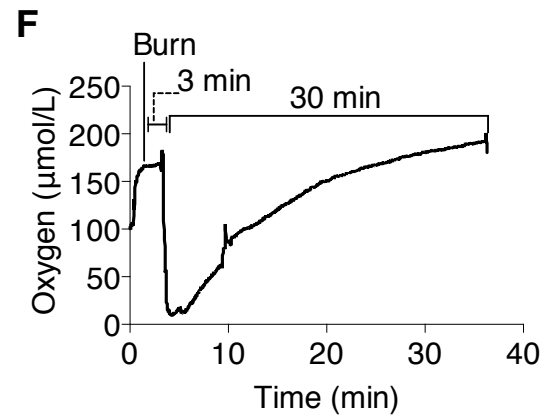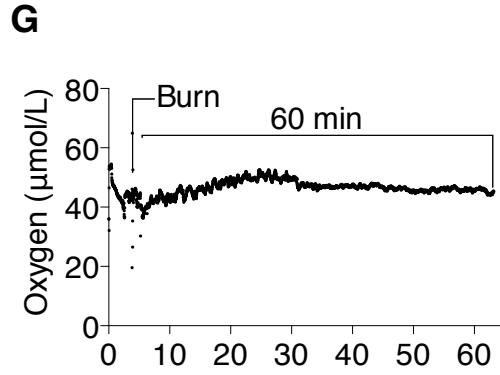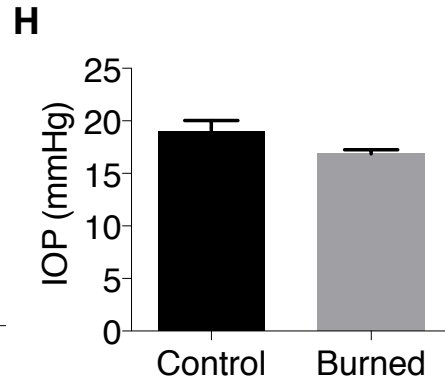

Supplement: mmc1.pdf [file mmc1.pdf]

**Cornea**

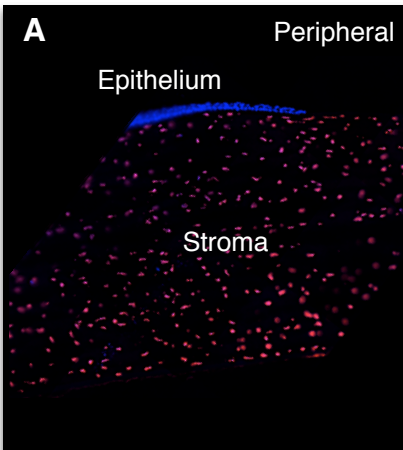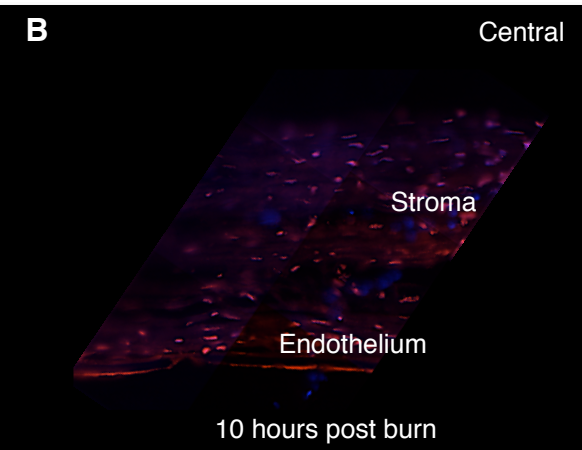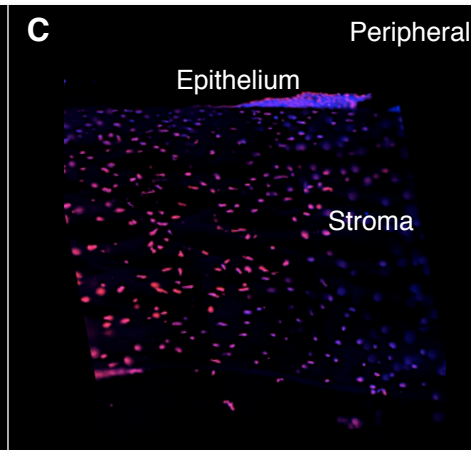

**Iris**

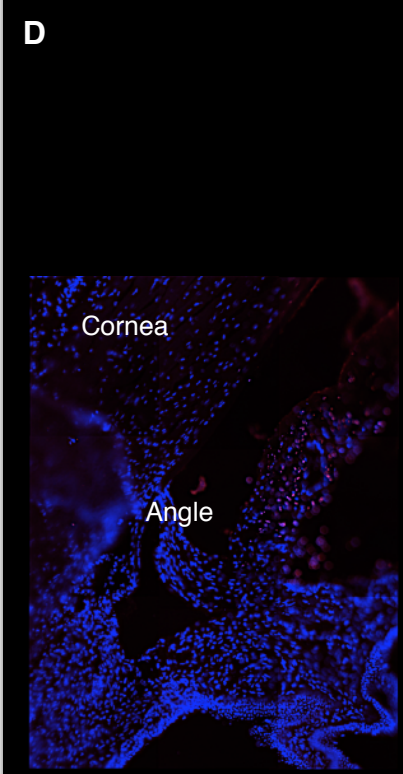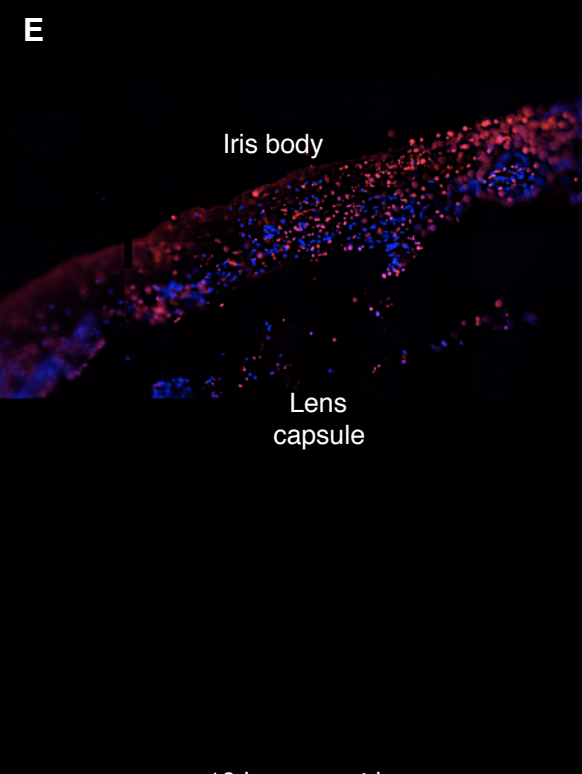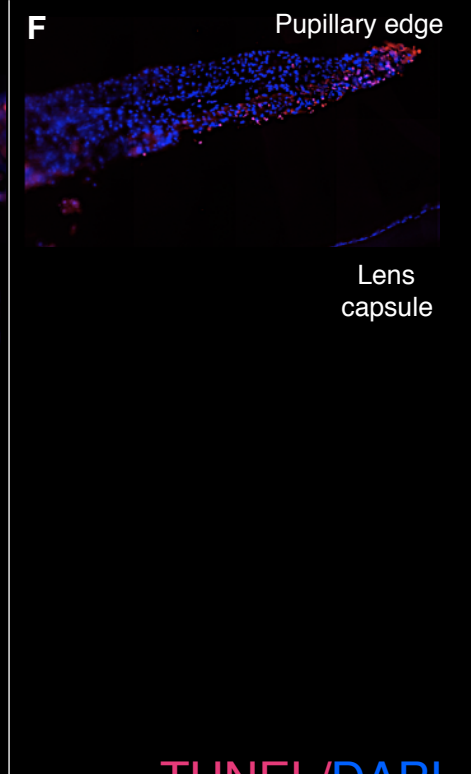

TUNEL/DAPI

**Retina**

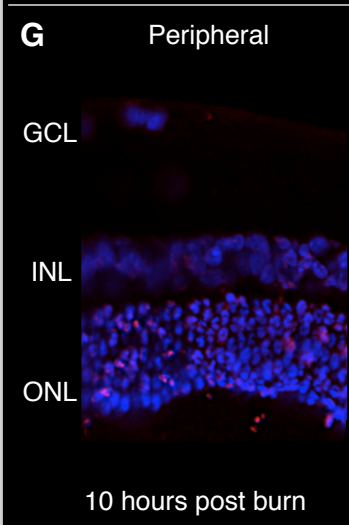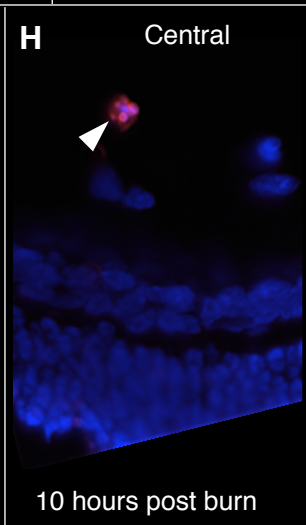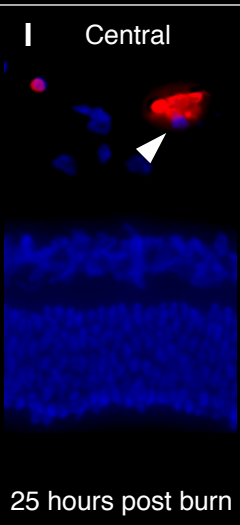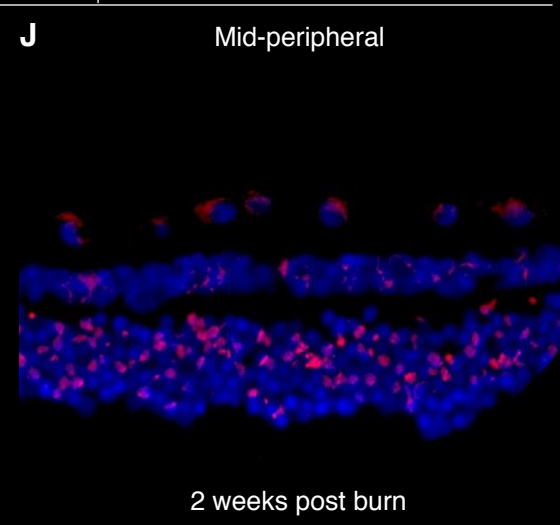

**Control**

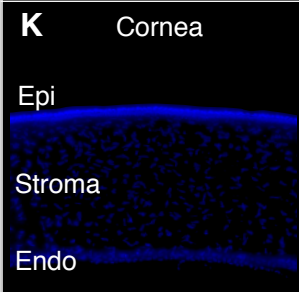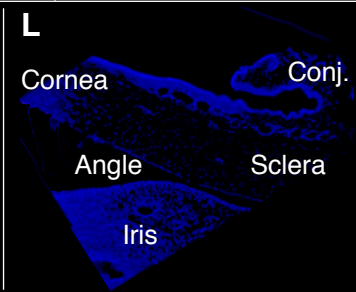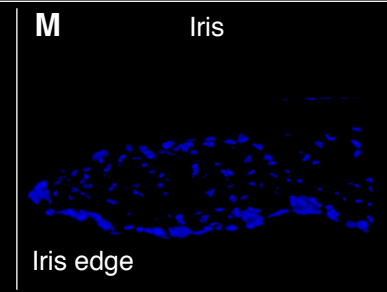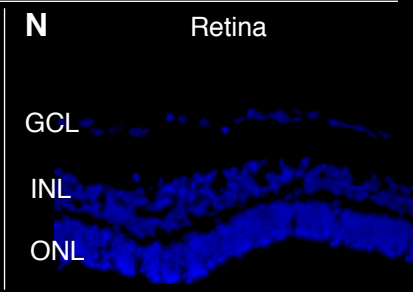

Supplement: mmc2.pdf [file mmc2.pdf]

### Non-burned

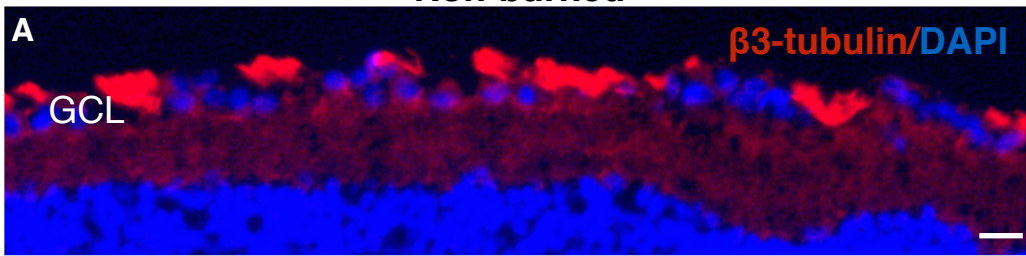

### Burned

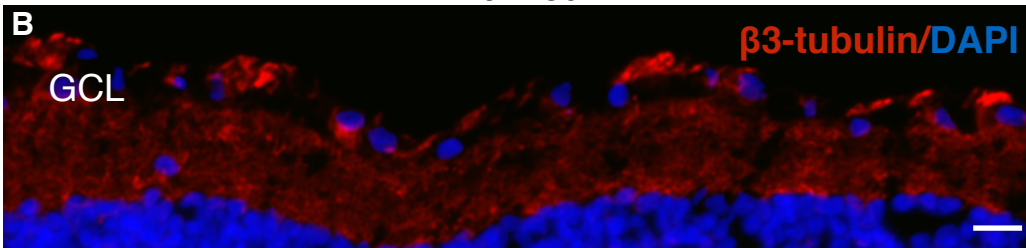

**C**

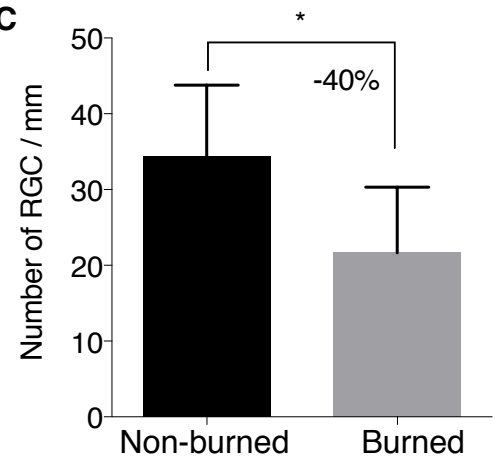

### Non-burned

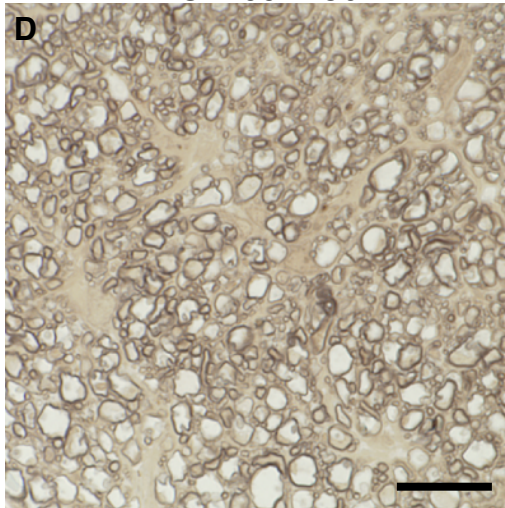

### Burned

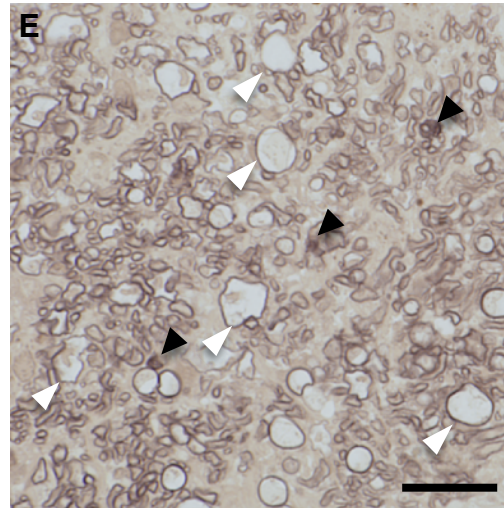

**F**

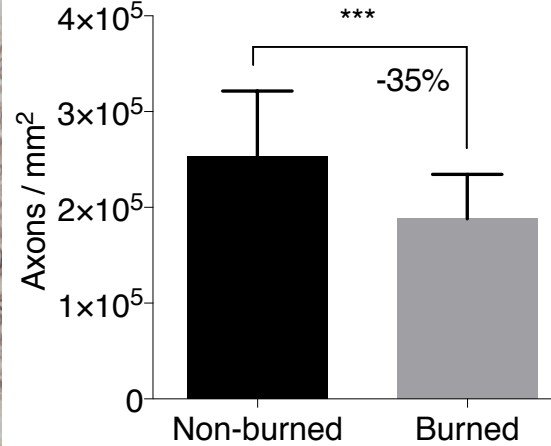

### Burned

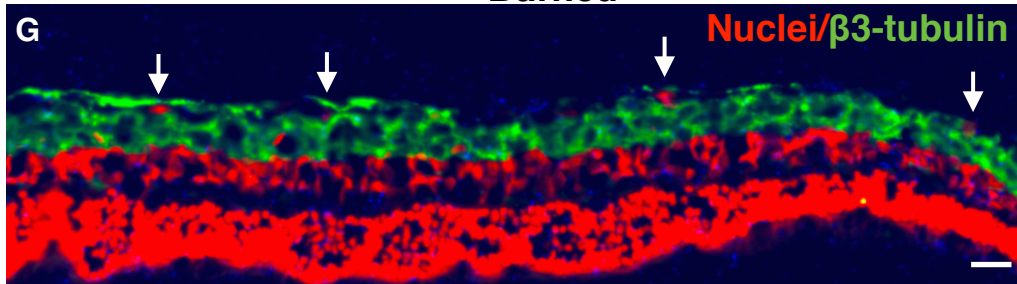

### Anti-TNF- $\alpha$ (IV)

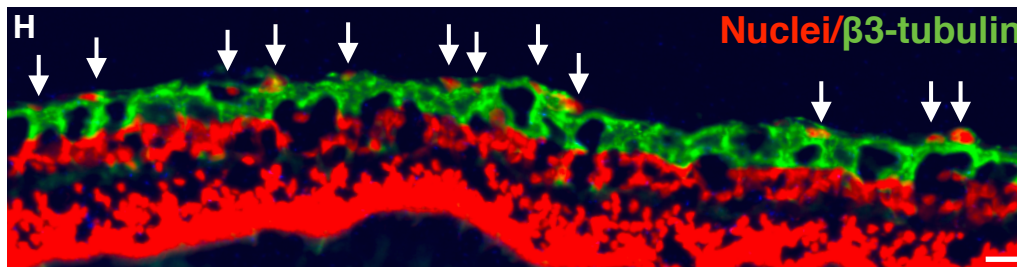

**I**

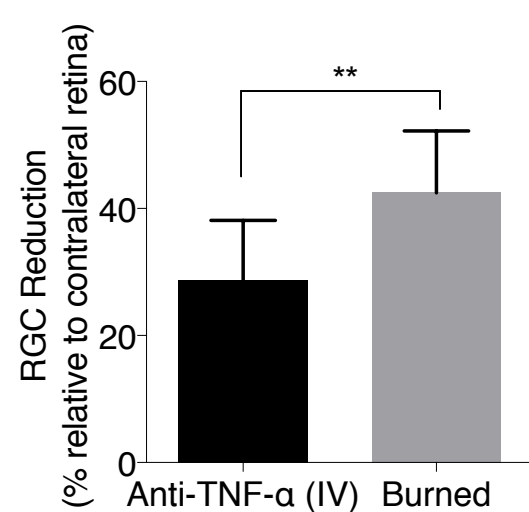

Supplement: mmc3.pdf [file mmc3.pdf]

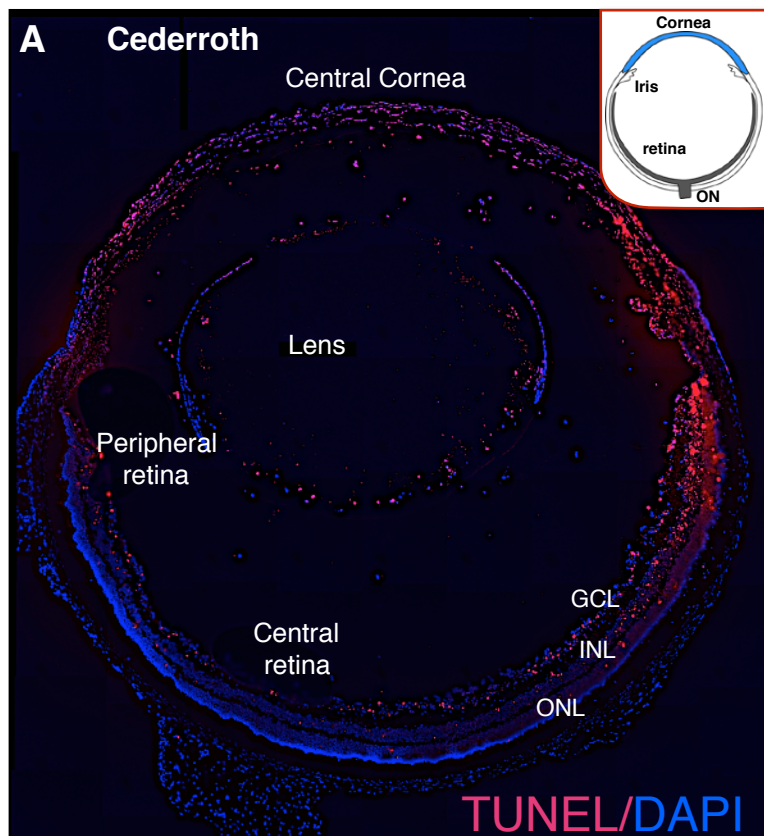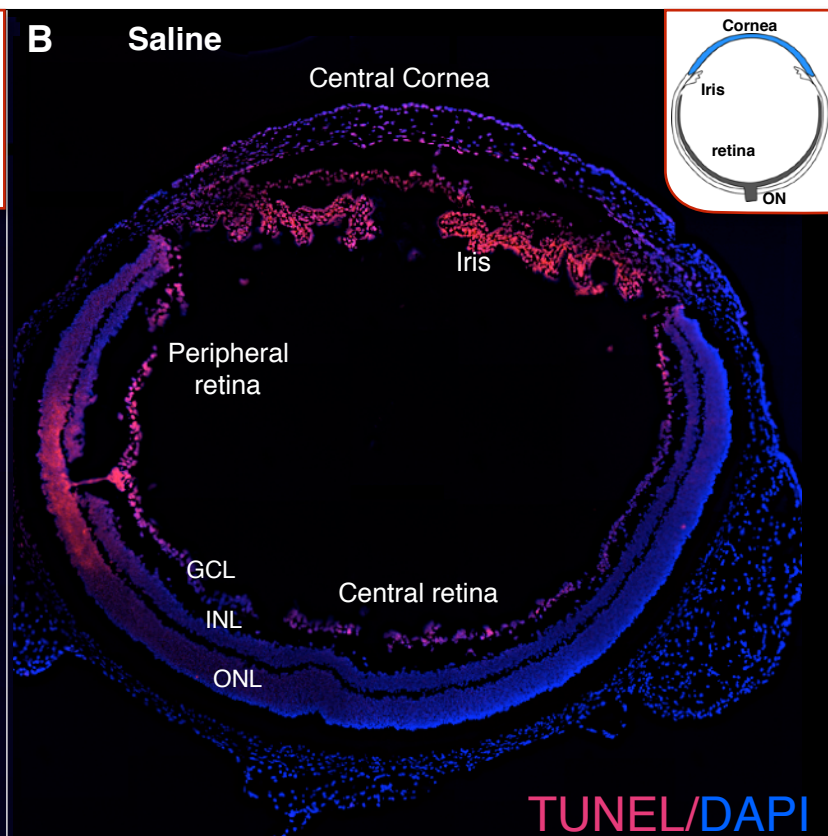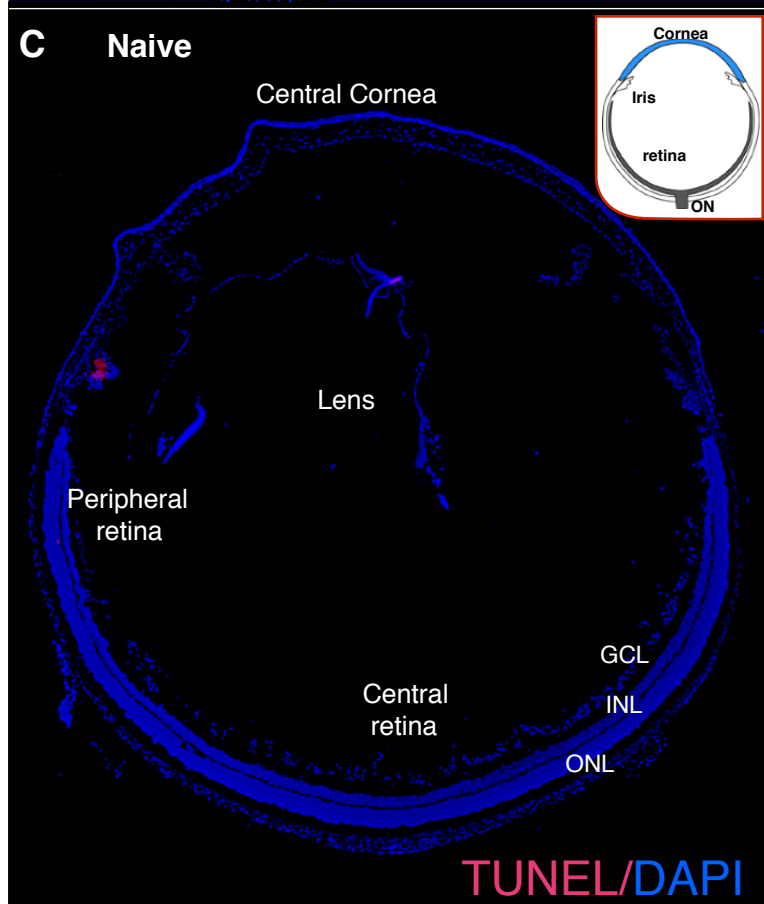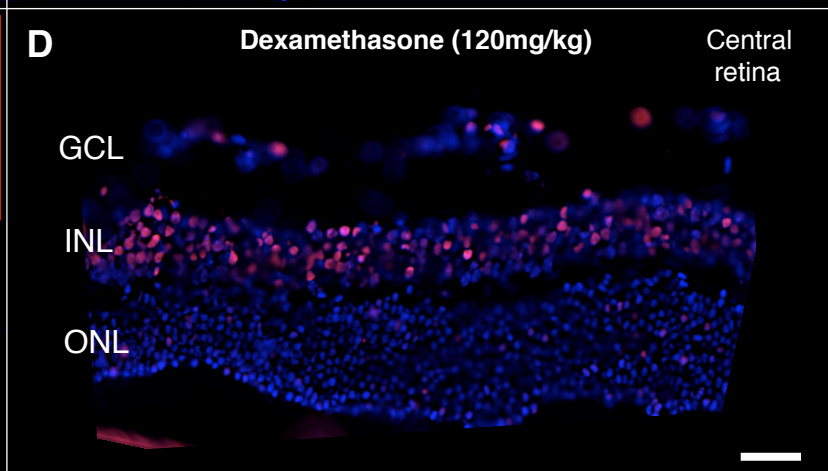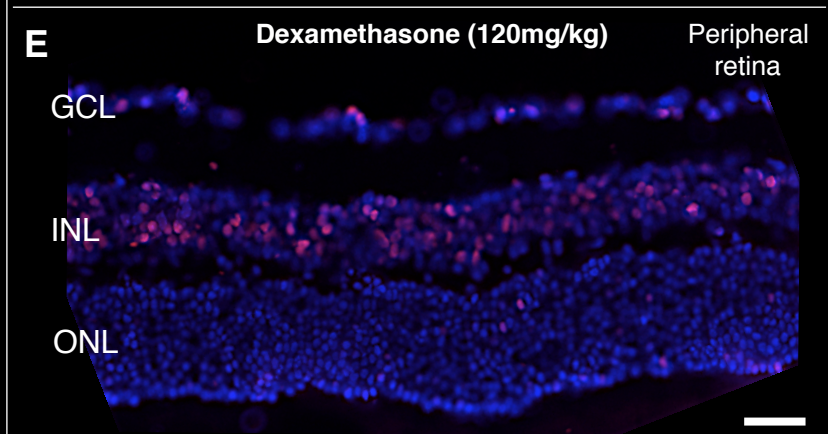

Supplement: mmc4.pdf [file mmc4.pdf]
